# Supplementary material for: The Efemp1R345W Macular Dystrophy Mutation Causes Amplified Circadian and Photophobic Responses to Light in Mice
Source: PubMed Central journal article supplement — Invest Ophthalmol Vis Sci. 2019 May;60(6):2110–7. doi: 10.1167/iovs.19-26881 (PMC6735810; doi:10.1167/iovs.19-26881), 2019-05

**Figure S1. Outer retina function. (A)** Example combined-response electroretinogram recordings show a- and b-wave amplitude wild-type and *Efemp1*<sup>R345W</sup> mice. **(B)** Mean derived amplitudes for a- and b-wave of wild-type (n = 8) and *Efemp1*<sup>R345W</sup> mice (n = 9), are plotted against the ten tested luminances from 0.0001 to 30 cd.s.m<sup>2</sup> (Mean ± SD). Responses are not statistically different by non-linear curve fit between for a-wave (P = 0.59), or b-wave (P = 0.60).

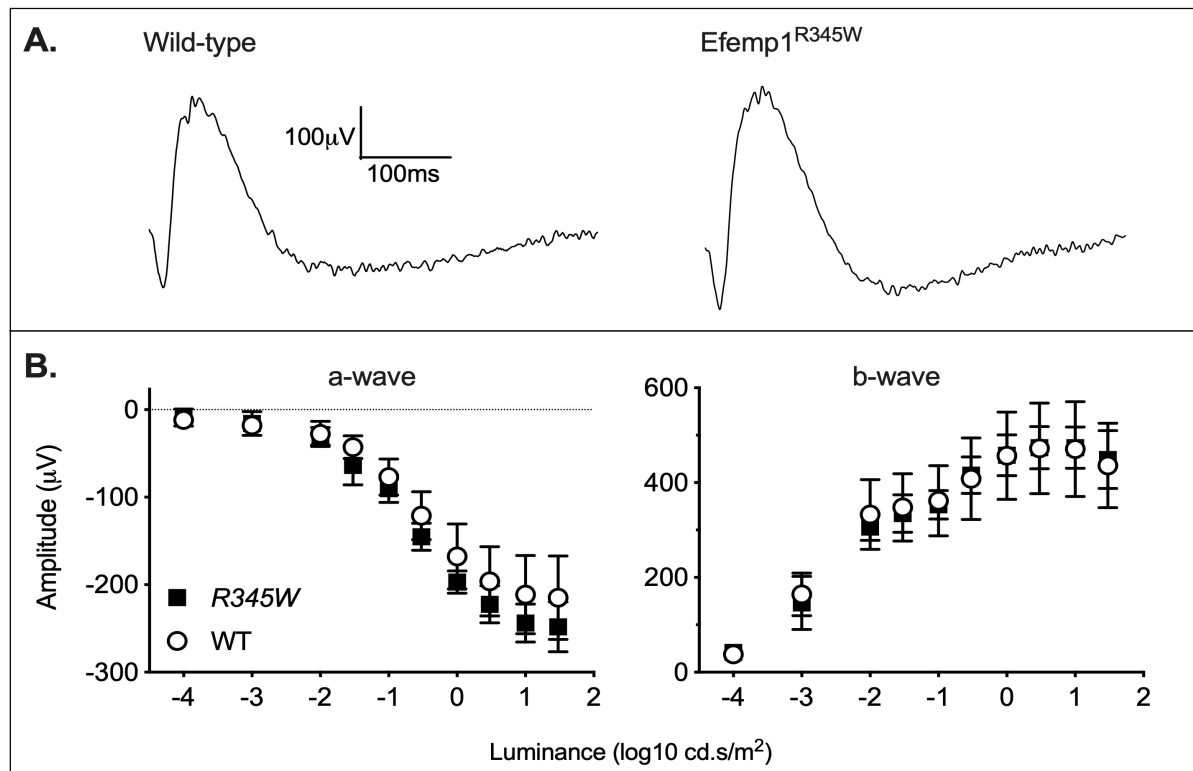

Supplement: iovs-60-06-17_s01.pdf [file iovs-60-06-17_s01.pdf]
