# Supplementary material for: The Efemp1R345W Macular Dystrophy Mutation Causes Amplified Circadian and Photophobic Responses to Light in Mice
Source: PubMed Central journal article supplement — Invest Ophthalmol Vis Sci. 2019 May;60(6):2110–7. doi: 10.1167/iovs.19-26881 (PMC6735810; doi:10.1167/iovs.19-26881), 2019-05
Supplement: iovs-60-06-17_s02.pdf [file iovs-60-06-17_s02.pdf]

## Supplementary material.

*Electroretinography.* Electroretinograms were recorded in 18 month old dark-adapted wild-type and *Efemp1<sup>R345W</sup>* mice (n = 8 each) mice using an Espion E2 system (Diagnosys, USA). Mice were anaesthetized with ketamine:xylazine (100:20 mg/kg), pupils dilated with Tropicamide 1% (Falcon Pharma, USA) and corneas moistened using GenTeal (Novartis, USA). Animals were positioned on a temperature-regulated platform. Corneal contact, midline subdermal reference, and ground electrodes were placed. Responses were recorded to ten stimuli ranging from 0.0001 to 30 cd.s.m<sup>-2</sup>. For statistical analysis between wild-type and *Efemp1<sup>R345W</sup>* mice, a- and b-wave amplitudes were fitted with non-linear regression curves that were compared by extra sum of squares F-test in GraphPad (Prism, La Jolla, CA). Curves were fitted to the data sets for two genotypes independently and then to the combined data set for both genotypes; the effect of combining data sets on the quality of fit was then used to calculate if there was a difference between genotypes for a given parameter (slope and EC50).
